# Supplementary material for: QTL analysis of four main stem bark traits using a GBS-SNP-based high-density genetic map in ramie
Source: PubMed Central journal article supplement (PMC5647422; doi:10.1038/s41598-017-13762-w), 2017-10-18
Supplement: 41598_2017_13762_MOESM1_ESM.pdf [file 41598_2017_13762_MOESM1_ESM.pdf]

## **QTL analysis of four main stem bark traits using a GBS-SNP-based high-density genetic map in ramie**

Chan Liu<sup>1,\*</sup>, Siyuan Zhu<sup>1,2,\*</sup>, Shouwei Tang<sup>1,2</sup>, Hongwu Wang<sup>3</sup>, Xia Zheng<sup>1,2</sup>,  
Xiaorong Chen<sup>4</sup>, Qiuzhong Dai<sup>1,2</sup>, Touming Liu<sup>1,2,✉</sup>

1 Institute of Bast Fiber Crops, Chinese Academy of Agricultural Sciences, Changsha, China

2 Researching Center of Deren Husbandry, Hunan, China

3 Xianning Agriculture Academy of sciences, Hubei, China

4 Yichun Institute of Agricultural Sciences, Jiangxi, China

\* These authors contributed equally to this work.

Corresponding authors:

Touming Liu: [liutouming@caas.cn](mailto:liutouming@caas.cn)

## Supplementary materials

Table S1 Summary of sequenced results in the FALs and two parents

| Sample | Clean reads | Q20(%) | Q30(%) | Tag     | Mapping reads | Mapping rate | Average depth | Total SNP |
|--------|-------------|--------|--------|---------|---------------|--------------|---------------|-----------|
| QDY    | 6,363,904   | 96.01  | 90.62  | 322,543 | 5,547,740     | 87.18        | 17.20         | 286,918   |
| ZZ1    | 6,437,948   | 95.62  | 89.75  | 350,185 | 6,044,197     | 93.88        | 17.26         | 240,243   |
| 1      | 2,027,900   | 96.67  | 91.98  | 189,402 | 1,803,107     | 88.91        | 9.52          | 129,211   |
| 2      | 2,728,428   | 96.41  | 91.58  | 248,065 | 2,483,131     | 91.01        | 10.01         | 171,870   |
| 3      | 2,018,740   | 96.27  | 91.00  | 185,734 | 1,831,338     | 90.72        | 9.86          | 153,112   |
| 4      | 1,986,286   | 96.08  | 90.55  | 151,446 | 1,496,288     | 75.33        | 9.88          | 159,580   |
| 5      | 1,915,360   | 96.44  | 91.48  | 164,158 | 1,648,144     | 86.05        | 10.04         | 152,384   |
| 6      | 1,796,890   | 96.38  | 91.21  | 137,039 | 1,384,091     | 77.03        | 10.10         | 110,174   |
| 7      | 1,877,658   | 95.56  | 89.29  | 146,739 | 1,596,522     | 85.03        | 10.88         | 115,894   |
| 8      | 2,608,740   | 96.47  | 91.62  | 217,053 | 2,274,716     | 87.20        | 10.48         | 206,218   |
| 9      | 1,824,194   | 96.37  | 91.39  | 150,688 | 1,571,678     | 86.16        | 10.43         | 129,519   |
| 10     | 2,108,022   | 96.42  | 91.41  | 174,633 | 1,870,321     | 88.72        | 10.71         | 139,895   |
| 11     | 2,056,482   | 96.61  | 91.66  | 176,276 | 1,820,927     | 88.55        | 10.33         | 150,410   |
| 12     | 2,323,316   | 96.52  | 91.57  | 180,139 | 2,017,556     | 86.84        | 11.20         | 164,446   |
| 13     | 2,656,772   | 96.44  | 91.44  | 190,197 | 2,189,170     | 82.40        | 11.51         | 166,480   |
| 14     | 2,112,722   | 96.53  | 91.75  | 154,222 | 1,705,693     | 80.73        | 11.06         | 106,691   |
| 15     | 2,357,368   | 96.40  | 91.44  | 176,208 | 2,019,341     | 85.66        | 11.46         | 117,845   |
| 16     | 2,078,824   | 96.26  | 91.17  | 177,994 | 1,810,197     | 87.08        | 10.17         | 141,255   |
| 17     | 2,257,890   | 96.31  | 91.43  | 171,397 | 1,923,077     | 85.17        | 11.22         | 134,292   |
| 18     | 2,584,344   | 96.48  | 91.64  | 208,696 | 2,201,745     | 85.20        | 10.55         | 146,855   |
| 19     | 2,047,506   | 96.03  | 90.47  | 148,597 | 1,676,170     | 81.86        | 11.28         | 159,434   |
| 20     | 2,404,852   | 96.41  | 91.32  | 200,877 | 2,099,163     | 87.29        | 10.45         | 161,806   |
| 21     | 2,480,558   | 96.55  | 91.72  | 202,001 | 2,201,811     | 88.76        | 10.90         | 149,091   |
| 22     | 2,588,126   | 96.19  | 91.03  | 185,014 | 2,088,804     | 80.71        | 11.29         | 187,790   |
| 23     | 2,538,478   | 96.75  | 92.32  | 185,802 | 2,125,573     | 83.73        | 11.44         | 160,469   |
| 24     | 2,430,512   | 96.66  | 92.13  | 180,471 | 2,064,585     | 84.94        | 11.44         | 171,105   |
| 25     | 2,557,702   | 96.66  | 92.05  | 184,672 | 2,027,699     | 79.28        | 10.98         | 155,140   |
| 26     | 2,435,202   | 96.65  | 92.06  | 189,462 | 2,127,657     | 87.37        | 11.23         | 138,687   |
| 27     | 2,537,518   | 96.09  | 90.82  | 184,864 | 2,220,217     | 87.50        | 12.01         | 159,127   |
| 28     | 2,399,682   | 95.80  | 90.24  | 178,286 | 2,023,545     | 84.33        | 11.35         | 145,460   |
| 29     | 3,203,110   | 96.56  | 91.83  | 233,608 | 2,786,941     | 87.01        | 11.93         | 214,200   |
| 30     | 2,332,224   | 96.22  | 91.10  | 181,270 | 2,026,600     | 86.90        | 11.18         | 124,801   |

|    |           |       |       |         |           |       |       |         |
|----|-----------|-------|-------|---------|-----------|-------|-------|---------|
| 31 | 1,790,608 | 95.00 | 88.53 | 138,456 | 1,535,472 | 85.75 | 11.09 | 90,087  |
| 32 | 2,783,512 | 96.52 | 91.80 | 202,861 | 2,428,242 | 87.24 | 11.97 | 183,153 |
| 33 | 2,233,298 | 96.66 | 92.08 | 179,130 | 1,943,565 | 87.03 | 10.85 | 130,698 |
| 34 | 2,136,716 | 96.17 | 91.05 | 167,707 | 1,885,023 | 88.22 | 11.24 | 139,074 |
| 35 | 2,554,870 | 96.38 | 91.39 | 208,456 | 2,228,391 | 87.22 | 10.69 | 194,841 |
| 36 | 2,665,378 | 96.17 | 91.04 | 202,237 | 2,303,476 | 86.42 | 11.39 | 137,144 |
| 37 | 2,855,868 | 96.47 | 91.66 | 208,647 | 2,370,225 | 82.99 | 11.36 | 202,832 |
| 39 | 2,731,428 | 96.63 | 92.12 | 209,258 | 2,356,241 | 86.26 | 11.26 | 185,042 |
| 40 | 2,576,704 | 96.50 | 91.78 | 188,672 | 2,160,299 | 83.84 | 11.45 | 160,007 |
| 41 | 1,411,886 | 96.60 | 92.20 | 129,750 | 1,182,024 | 83.72 | 9.11  | 106,662 |
| 42 | 1,452,114 | 96.81 | 92.65 | 118,809 | 1,266,499 | 87.22 | 10.66 | 98,708  |
| 44 | 1,713,162 | 96.90 | 92.77 | 136,048 | 1,420,345 | 82.91 | 10.44 | 93,778  |
| 45 | 1,567,998 | 96.07 | 90.95 | 120,633 | 1,277,505 | 81.47 | 10.59 | 101,817 |
| 47 | 1,471,476 | 96.48 | 91.88 | 125,015 | 1,302,661 | 88.53 | 10.42 | 84,754  |
| 48 | 1,503,570 | 96.82 | 92.59 | 119,729 | 1,293,069 | 86.00 | 10.80 | 106,799 |
| 49 | 3,334,698 | 96.79 | 92.27 | 194,202 | 2,893,615 | 86.77 | 14.90 | 164,911 |
| 50 | 3,225,328 | 97.12 | 92.93 | 226,511 | 2,835,915 | 87.93 | 12.52 | 223,636 |
| 51 | 2,675,688 | 96.95 | 92.52 | 194,095 | 2,296,141 | 85.81 | 11.83 | 148,495 |
| 52 | 2,821,176 | 97.07 | 92.86 | 205,363 | 2,515,697 | 89.17 | 12.25 | 188,425 |
| 53 | 2,635,214 | 97.16 | 93.05 | 188,407 | 2,277,835 | 86.44 | 12.09 | 187,005 |
| 54 | 3,190,060 | 96.99 | 92.62 | 202,214 | 2,731,907 | 85.64 | 13.51 | 227,287 |
| 55 | 2,811,980 | 96.55 | 91.61 | 192,672 | 2,452,717 | 87.22 | 12.73 | 202,691 |
| 56 | 2,813,732 | 97.07 | 92.95 | 191,733 | 2,463,766 | 87.56 | 12.85 | 232,232 |
| 57 | 3,298,530 | 96.93 | 92.55 | 203,386 | 2,863,673 | 86.82 | 14.08 | 146,199 |
| 58 | 2,844,782 | 97.09 | 92.88 | 191,638 | 2,447,211 | 86.02 | 12.77 | 196,533 |
| 59 | 2,959,358 | 97.00 | 92.71 | 196,419 | 2,577,011 | 87.08 | 13.12 | 166,680 |
| 60 | 3,331,462 | 96.90 | 92.41 | 204,873 | 2,888,710 | 86.71 | 14.10 | 201,256 |
| 62 | 2,404,578 | 96.88 | 92.41 | 191,649 | 2,180,960 | 90.70 | 11.38 | 215,375 |
| 65 | 2,894,052 | 96.97 | 92.45 | 219,369 | 2,520,548 | 87.09 | 11.49 | 215,949 |
| 66 | 3,011,916 | 96.89 | 92.34 | 188,465 | 2,353,925 | 78.15 | 12.49 | 144,056 |
| 67 | 2,877,618 | 97.06 | 92.75 | 222,265 | 2,518,257 | 87.51 | 11.33 | 184,908 |
| 68 | 2,847,176 | 97.12 | 93.04 | 193,052 | 2,106,195 | 73.97 | 10.91 | 234,132 |
| 69 | 2,693,638 | 97.13 | 92.95 | 186,569 | 2,298,536 | 85.33 | 12.32 | 153,598 |
| 70 | 2,840,924 | 97.05 | 92.77 | 198,129 | 2,494,446 | 87.80 | 12.59 | 201,815 |
| 71 | 2,744,444 | 97.12 | 93.03 | 202,989 | 2,368,882 | 86.32 | 11.67 | 227,318 |
| 72 | 2,912,998 | 97.14 | 93.01 | 196,597 | 2,418,145 | 83.01 | 12.30 | 186,125 |
| 73 | 2,544,796 | 96.74 | 91.89 | 160,132 | 2,052,894 | 80.67 | 12.82 | 153,169 |

|     |           |       |       |         |           |       |       |         |
|-----|-----------|-------|-------|---------|-----------|-------|-------|---------|
| 75  | 2,875,880 | 96.89 | 92.34 | 199,522 | 2,454,124 | 85.33 | 12.30 | 141,814 |
| 76  | 2,969,242 | 97.11 | 92.93 | 235,449 | 2,641,736 | 88.97 | 11.22 | 210,427 |
| 77  | 2,867,714 | 96.97 | 92.46 | 210,958 | 2,388,041 | 83.27 | 11.32 | 211,604 |
| 78  | 2,902,726 | 97.34 | 93.46 | 201,302 | 2,393,480 | 82.46 | 11.89 | 211,206 |
| 79  | 2,783,376 | 97.23 | 93.19 | 198,173 | 2,360,237 | 84.80 | 11.91 | 206,404 |
| 80  | 2,749,638 | 97.22 | 93.09 | 189,086 | 2,287,940 | 83.21 | 12.10 | 180,643 |
| 81  | 2,970,030 | 97.11 | 92.94 | 194,483 | 2,431,036 | 81.85 | 12.50 | 210,175 |
| 82  | 2,642,786 | 96.81 | 92.15 | 206,977 | 2,365,744 | 89.52 | 11.43 | 211,022 |
| 83  | 2,664,134 | 96.67 | 91.75 | 171,099 | 2,231,134 | 83.75 | 13.04 | 137,763 |
| 84  | 2,914,876 | 97.33 | 93.28 | 195,596 | 2,577,955 | 88.44 | 13.18 | 236,918 |
| 85  | 2,544,096 | 96.91 | 92.37 | 177,944 | 2,167,362 | 85.19 | 12.18 | 224,149 |
| 86  | 2,356,938 | 96.13 | 90.46 | 149,601 | 1,958,272 | 83.09 | 13.09 | 136,923 |
| 87  | 3,044,244 | 97.06 | 92.82 | 219,510 | 2,686,805 | 88.26 | 12.24 | 222,968 |
| 88  | 2,609,444 | 97.02 | 92.76 | 171,591 | 2,206,659 | 84.56 | 12.86 | 164,376 |
| 89  | 2,243,734 | 96.62 | 91.75 | 165,794 | 1,924,867 | 85.79 | 11.61 | 112,723 |
| 90  | 1,811,612 | 96.72 | 91.81 | 150,473 | 1,566,428 | 86.47 | 10.41 | 117,147 |
| 91  | 2,090,308 | 96.76 | 91.93 | 149,197 | 1,759,033 | 84.15 | 11.79 | 112,166 |
| 92  | 2,146,326 | 96.86 | 92.19 | 156,683 | 1,602,864 | 74.68 | 10.23 | 153,576 |
| 93  | 2,109,424 | 96.82 | 92.27 | 175,224 | 1,838,095 | 87.14 | 10.49 | 159,444 |
| 94  | 2,193,062 | 96.72 | 91.97 | 158,584 | 1,872,877 | 85.40 | 11.81 | 139,302 |
| 95  | 1,913,032 | 96.59 | 91.72 | 137,451 | 1,665,905 | 87.08 | 12.12 | 126,428 |
| 96  | 2,256,874 | 96.87 | 92.36 | 179,799 | 1,959,804 | 86.84 | 10.90 | 172,704 |
| 97  | 2,192,590 | 96.81 | 92.18 | 166,955 | 1,906,624 | 86.96 | 11.42 | 155,415 |
| 98  | 1,931,152 | 96.35 | 91.00 | 136,292 | 1,649,131 | 85.40 | 12.10 | 91,747  |
| 99  | 2,073,180 | 96.65 | 91.69 | 162,534 | 1,805,755 | 87.10 | 11.11 | 112,370 |
| 100 | 2,048,720 | 96.94 | 92.37 | 143,961 | 1,730,412 | 84.46 | 12.02 | 142,626 |
| 101 | 1,955,530 | 96.62 | 91.59 | 145,264 | 1,635,672 | 83.64 | 11.26 | 130,237 |
| 102 | 2,106,384 | 96.94 | 92.52 | 158,543 | 1,793,121 | 85.13 | 11.31 | 148,383 |
| 103 | 2,191,836 | 96.86 | 92.29 | 174,715 | 1,923,608 | 87.76 | 11.01 | 160,802 |
| 104 | 2,189,762 | 96.91 | 92.31 | 172,021 | 1,928,351 | 88.06 | 11.21 | 122,898 |
| 105 | 2,106,804 | 96.83 | 92.20 | 159,302 | 1,833,561 | 87.03 | 11.51 | 140,192 |
| 106 | 2,028,390 | 96.60 | 91.55 | 142,833 | 1,671,141 | 82.39 | 11.70 | 137,857 |
| 107 | 1,849,610 | 96.37 | 91.03 | 136,793 | 1,567,648 | 84.76 | 11.46 | 94,032  |
| 108 | 2,222,130 | 96.96 | 92.38 | 147,200 | 1,812,026 | 81.54 | 12.31 | 105,796 |
| 109 | 1,910,302 | 96.62 | 91.63 | 143,465 | 1,621,155 | 84.86 | 11.30 | 134,970 |
| 111 | 2,227,792 | 96.78 | 92.09 | 159,652 | 1,915,820 | 86.00 | 12.00 | 193,775 |
| 113 | 2,224,980 | 96.77 | 92.05 | 167,288 | 1,933,846 | 86.92 | 11.56 | 159,415 |

|                |                    |              |              |                |                  |              |              |                |
|----------------|--------------------|--------------|--------------|----------------|------------------|--------------|--------------|----------------|
| 114            | 1,985,392          | 95.72        | 90.06        | 146,509        | 1,654,083        | 83.31        | 11.29        | 116,175        |
| 115            | 2,451,862          | 95.97        | 90.88        | 198,466        | 2,109,694        | 86.04        | 10.63        | 136,505        |
| 116            | 2,207,704          | 95.87        | 90.64        | 181,064        | 1,899,363        | 86.03        | 10.49        | 127,516        |
| 117            | 2,332,088          | 95.88        | 90.59        | 189,405        | 2,053,155        | 88.04        | 10.84        | 134,703        |
| 118            | 2,188,874          | 95.87        | 90.62        | 164,158        | 1,892,747        | 86.47        | 11.53        | 152,867        |
| 119            | 2,189,736          | 95.71        | 90.06        | 166,514        | 1,896,597        | 86.61        | 11.39        | 134,753        |
| 120            | 1,895,998          | 95.57        | 89.72        | 136,528        | 1,568,707        | 82.74        | 11.49        | 130,925        |
| 121            | 2,185,854          | 95.92        | 90.66        | 159,316        | 1,908,601        | 87.32        | 11.98        | 112,444        |
| 122            | 1,823,052          | 95.80        | 90.28        | 130,603        | 1,511,073        | 82.89        | 11.57        | 120,642        |
| 123            | 1,777,064          | 95.00        | 88.41        | 121,555        | 1,482,977        | 83.45        | 12.20        | 139,821        |
| 125            | 2,316,534          | 95.91        | 90.66        | 166,072        | 1,966,289        | 84.88        | 11.84        | 126,211        |
| 126            | 2,144,854          | 95.78        | 90.44        | 163,383        | 1,880,540        | 87.68        | 11.51        | 150,866        |
| 128            | 2,167,952          | 95.92        | 90.50        | 167,826        | 1,866,230        | 86.08        | 11.12        | 162,661        |
| 129            | 2,117,888          | 95.82        | 90.36        | 164,342        | 1,812,691        | 85.59        | 11.03        | 181,216        |
| 130            | 2,280,556          | 95.79        | 90.41        | 169,802        | 1,925,552        | 84.43        | 11.34        | 126,803        |
| 131            | 2,454,242          | 95.85        | 90.64        | 175,075        | 2,114,906        | 86.17        | 12.08        | 156,859        |
| 132            | 2,075,202          | 95.87        | 90.56        | 148,044        | 1,664,010        | 80.19        | 11.24        | 127,925        |
| 134            | 2,425,322          | 95.70        | 90.28        | 191,288        | 2,150,082        | 88.65        | 11.24        | 142,208        |
| 135            | 2,458,906          | 95.71        | 90.43        | 173,195        | 2,142,427        | 87.13        | 12.37        | 166,437        |
| 136            | 2,480,974          | 95.84        | 90.57        | 175,147        | 2,145,553        | 86.48        | 12.25        | 145,154        |
| 137            | 2,006,012          | 95.50        | 89.62        | 151,584        | 1,703,801        | 84.93        | 11.24        | 137,261        |
| 138            | 2,220,146          | 95.71        | 90.13        | 159,505        | 1,899,702        | 85.57        | 11.91        | 123,313        |
| 139            | 2,120,366          | 95.90        | 90.64        | 168,333        | 1,846,609        | 87.09        | 10.97        | 155,225        |
| 140            | 2,176,642          | 95.81        | 90.51        | 162,041        | 1,850,504        | 85.02        | 11.42        | 143,183        |
| 141            | 1,923,104          | 95.80        | 90.38        | 151,825        | 1,609,341        | 83.68        | 10.60        | 137,076        |
| 142            | 1,932,128          | 95.92        | 90.72        | 152,984        | 1,664,461        | 86.15        | 10.88        | 124,085        |
| 143            | 1,974,796          | 96.03        | 90.93        | 153,334        | 1,697,403        | 85.95        | 11.07        | 99,700         |
| 144            | 2,058,112          | 95.92        | 90.60        | 143,561        | 1,761,488        | 85.59        | 12.27        | 145,122        |
| 145            | 1,992,698          | 95.78        | 90.16        | 132,159        | 1,763,004        | 88.47        | 13.34        | 81,774         |
| 146            | 2,495,194          | 96.56        | 91.92        | 202,983        | 2,129,294        | 85.34        | 10.49        | 219,337        |
| <b>Total</b>   | <b>329,017,904</b> |              |              | <b>489,057</b> |                  |              |              |                |
| <b>Average</b> |                    | <b>96.47</b> | <b>91.59</b> |                | <b>2,072,477</b> | <b>85.49</b> | <b>11.59</b> | <b>156,300</b> |

---

Table S2 Summary of the high-density genetic map

| Linkage group | Number of markers |             | Length (cM) | Average marker interval (cM) | Maximum interval (cM) | Number of interval with > 10 cM |
|---------------|-------------------|-------------|-------------|------------------------------|-----------------------|---------------------------------|
|               | All SNPs          | Binned SNPs |             |                              |                       |                                 |
| LG 1          | 434               | 289         | 117.6       | 0.407                        | 11.5                  | 1                               |
| LG 2          | 387               | 255         | 122.2       | 0.479                        | 4.3                   | 0                               |
| LG 3          | 99                | 86          | 98.3        | 1.143                        | 5.8                   | 0                               |
| LG 4          | 462               | 302         | 213.6       | 0.707                        | 25.2                  | 3                               |
| LG 5          | 275               | 160         | 116.8       | 0.730                        | 21.0                  | 1                               |
| LG 6          | 339               | 211         | 140.7       | 0.667                        | 7.9                   | 0                               |
| LG 7          | 254               | 189         | 150.2       | 0.795                        | 14.0                  | 1                               |
| LG 8          | 265               | 196         | 148.7       | 0.759                        | 6.5                   | 0                               |
| LG 9          | 247               | 189         | 106.9       | 0.566                        | 4.4                   | 0                               |
| LG 10         | 211               | 161         | 108.2       | 0.672                        | 6.0                   | 0                               |
| LG 11         | 177               | 150         | 105.1       | 0.701                        | 10.3                  | 1                               |
| LG 12         | 322               | 244         | 132.9       | 0.545                        | 9.9                   | 0                               |
| LG 13         | 298               | 201         | 144.4       | 0.718                        | 6.8                   | 0                               |
| LG 14         | 568               | 332         | 237.3       | 0.715                        | 6.4                   | 0                               |
| All           | 4338              | 2965        | 1942.9      | 0.655                        | -                     | 13                              |

Table S3 The genes identified in the candidate 5.1 cM regions of *qBT4a*

| Scaffold       | Gene ID                       | Annotation                                                   |
|----------------|-------------------------------|--------------------------------------------------------------|
| scaffold46555  | XP_010086871.1_D9             | -                                                            |
| scaffold46555  | evm.model.scaffold44589.78_D1 | Protein VASCULAR ASSOCIATED DEATH 1                          |
| scaffold46555  | XP_010096878.1_D4             | Uncharacterized protein                                      |
| scaffold77073  | XP_010090924.1_D3             | Cytochrome b-c1 complex subunit Rieske-1                     |
| scaffold77073  | XP_010109995.1_D105           | Uncharacterized protein                                      |
| scaffold77073  | XP_010096980.1_D64            | Uncharacterized protein                                      |
| scaffold77073  | XP_010105230.1_D157           | Uncharacterized protein                                      |
| scaffold77073  | evm.model.scaffold41653.3_D1  | 30S ribosomal protein S2                                     |
| scaffold77073  | VIT_03s0132g00110.t01_D205    | Uncharacterized protein                                      |
| scaffold459380 | evm.model.scaffold15095.22_D1 |                                                              |
| scaffold460912 | XP_010106767.1_D29            | Putative ribonuclease H protein                              |
| scaffold461852 | XP_010106767.1_D9             | Non-LTR retroelement reverse transcriptase-like protein      |
| scaffold92967  | XP_010091047.1_D1             | Probable alpha-mannosidase I MNS5                            |
| scaffold92967  | XP_010091049.1_D1             | Calmodulin-binding protein 60 A                              |
| scaffold92967  | VIT_05s0062g00060.t01_D12     | Retrovirus-related Pol polyprotein from transposon TNT 1-94  |
| scaffold92967  | <b>XP_010091051.1_D2</b>      | <b>UDP-glycosyltransferase</b>                               |
| scaffold92967  | XP_010111544.1_D1             | LIM domain-containing protein WLIM1                          |
| scaffold92967  | XP_010091042.1_D2             | Uncharacterized RING finger protein C2F3.16、                 |
| scaffold92967  | evm.model.scaffold40715.61_D1 | LOB domain-containing protein 27                             |
| scaffold92967  | XP_010106306.1_D2             | Protein TRANSPARENT TESTA 12                                 |
| scaffold92967  | XP_010108321.1_D1             | Uncharacterized protein                                      |
| scaffold92967  | XP_010091046.1_D1             | Peroxidase 65                                                |
| scaffold92967  | XP_010111542.1_D1             | Uncharacterized protein                                      |
| scaffold92967  | evm.model.scaffold17401.38_D1 | Succinate dehydrogenase subunit 7B                           |
| scaffold92967  | XP_010091045.1_D1             | Putative DNA glycosylase At3g47830                           |
| scaffold92967  | XP_010111543.1_D1             | Pentatricopeptide repeat-containing protein At5g66520        |
| scaffold92967  | XP_010091044.1_D2             | U-box domain-containing protein 38                           |
| scaffold92967  | XP_010091052.1_D1             | Uncharacterized protein At5g50100                            |
| scaffold116363 | XP_010091790.1_D1             | Acid phosphatase 1                                           |
| scaffold116363 | XP_010091822.1_D1             | NADH dehydrogenase [ubiquinone] 1 alpha subcomplex subunit 9 |
| scaffold116363 | XP_010091838.1_D1             | Protein QUIRKY                                               |
| scaffold116363 | evm.model.scaffold30633.17_D1 | Uncharacterized protein                                      |
| scaffold116363 | XP_010091823.1_D1             | ABC transporter C family member 5                            |
| scaffold116363 | evm.model.scaffold7373.108_D1 | Putative F-box/FBD/LRR-repeat protein At4g13965              |
| scaffold116363 | <b>XP_010091820.1_D1</b>      | <b>Galactosyltransferase</b>                                 |
| scaffold116363 | XP_010091794.1_D1             | Glutathionyl-hydroquinone reductase YqjG                     |
| scaffold116363 | XP_010093087.1_D1             | Protein JASON OS=Arabidopsis thaliana                        |
| scaffold116363 | XP_010091798.1_D1             | Mitochondrial import receptor subunit TOM9-2                 |
| scaffold116363 | XP_010091826.1_D1             | WD repeat-containing protein 70                              |
| scaffold116363 | XP_010091805.1_D1             | Auxin-responsive protein IAA11                               |
| scaffold116363 | XP_010091825.1_D1             | Tyrosine decarboxylase 1                                     |

|                |                               |                                                             |
|----------------|-------------------------------|-------------------------------------------------------------|
| scaffold116363 | XP_010091802.1_D1             | Uncharacterized protein                                     |
| scaffold116363 | XP_010091791.1_D1             | Uncharacterized protein                                     |
| scaffold116363 | XP_010091837.1_D1             | Sulfofructose kinase                                        |
| scaffold116363 | XP_010091833.1_D1             | WD repeat-containing protein 26                             |
| scaffold116363 | XP_010091799.1_D1             | Uncharacterized protein                                     |
| scaffold116363 | XP_010091831.1_D1             | RmlC-like cupins superfamily protein                        |
| scaffold116363 | XP_010093083.1_D1             | Exocyst complex component EXO84B                            |
| scaffold116363 | XP_010091818.1_D1             | Photosystem II reaction center PSB28 protein                |
| scaffold116363 | VIT_07s0005g04110.t01_D1      | Cellulose synthase A catalytic subunit 4 [UDP-forming]      |
| scaffold116363 | VIT_16s0148g00020.t01_D1      | Probable LRR receptor-like serine/threonine-protein kinase  |
| scaffold116363 | VIT_03s0063g01600.t01_D5      | -                                                           |
| scaffold116363 | evm.model.scaffold7373.144_D1 | Pre-mRNA-processing factor 39                               |
| scaffold116363 | XP_010091821.1_D1             | -                                                           |
| scaffold116363 | XP_010093085.1_D1             | Protein NRT1/ PTR FAMILY                                    |
| scaffold116363 | XP_010093085.1_D2             | Protein NRT1/ PTR FAMILY                                    |
| scaffold116363 | XP_010091806.1_D1             | Leucine-rich repeat receptor-like protein kinase PXL2       |
| scaffold116363 | XP_010091830.1_D1             | Alcohol dehydrogenase class-3                               |
| scaffold116363 | XP_010091797.1_D1             | Cysteine-rich repeat secretory protein 56                   |
| scaffold116363 | XP_010091795.1_D1             | Histone-lysine N-methyltransferase SUVR2                    |
| scaffold116363 | XP_010093086.1_D1             | Heterogeneous nuclear ribonucleoprotein 1                   |
| scaffold116363 | XP_010091788.1_D1             | Probable LRR receptor-like serine/threonine-protein kinase  |
| scaffold116363 | XP_010091804.1_D1             | W9RB84_9ROSA Uncharacterized protein                        |
| scaffold116363 | XP_010091841.1_D1             | BRCA1-associated RING domain protein 1                      |
| scaffold116363 | XP_010091801.1_D1             | Putative G3BP-like protein                                  |
| scaffold116363 | XP_010091832.1_D1             | Activating molecule in BECN1-regulated autophagy protein 1  |
| scaffold116363 | evm.model.scaffold7373.177_D1 | Receptor-like serine/threonine-protein kinase ALE2          |
| scaffold116363 | VIT_07s0005g04590.t01_D1      | Tetratricopeptide repeat protein 4 homolog                  |
| scaffold116363 | XP_010091819.1_D1             | Subtilisin-like protease SBT1.2                             |
| scaffold116363 | XP_010091827.1_D1             | DENN domain-containing protein 5B                           |
| scaffold116363 | evm.model.scaffold7373.133_D1 | MYB domain protein                                          |
| scaffold116363 | evm.model.scaffold29199.37_D2 | 60S ribosomal protein L23                                   |
| scaffold116363 | VIT_07s0005g03910.t01_D1      | Phospholipid--sterol O-acyltransferase                      |
| scaffold116363 | XP_010091803.1_D1             | W9QPL3_9ROSA Uncharacterized protein                        |
| scaffold94597  | XP_010107729.1_D52            | Putative AC transposase OS=Zea mays PE=2 SV=2               |
| scaffold77675  | XP_010097746.1_D2             | Protein ECERIFERUM 1                                        |
| scaffold104223 | XP_010109995.1_D24            | Uncharacterized protein                                     |
| scaffold104223 | VIT_07s0005g05830.t01_D6      | -                                                           |
| scaffold104223 | XP_010087579.1_D22            | Uncharacterized protein                                     |
| scaffold111657 | evm.model.scaffold38181.17_D4 | Glycolipid transfer protein 3                               |
| scaffold111657 | XP_010097326.1_D29            | Retrovirus-related Pol polyprotein from transposon TNT 1-94 |
| scaffold50309  | XP_010102096.1_D1             | Uncharacterized protein                                     |
| scaffold50309  | XP_010088789.1_D29            | Uncharacterized protein                                     |
| scaffold50309  | XP_010096916.1_D5             | Ty3/gypsy retrotransposon protein                           |
| scaffold50309  | XP_010105983.1_D73            | Uncharacterized protein                                     |



|                |                            |                                                        |
|----------------|----------------------------|--------------------------------------------------------|
| scaffold50309  | XP_010103526.1_D26         | Uncharacterized protein                                |
| scaffold50309  | XP_010087321.1_D64         | -                                                      |
| scaffold34965  | XP_010097762.1_D1          | Acyl carrier protein 1                                 |
| scaffold34965  | VIT_03s01110g00150.t01_D15 | Putative uncharacterized protein                       |
| scaffold34965  | XP_010096171.1_D12         | -                                                      |
| scaffold34965  | XP_010097763.1_D1          | Putative invertase inhibitor                           |
| scaffold34965  | XP_010096172.1_D11         | Uncharacterized protein                                |
| scaffold34965  | ATMG00750.1_D56            | Uncharacterized mitochondrial protein                  |
| scaffold109281 | VIT_00s0208g00040.t01_D6   | Putative uncharacterized protein                       |
| scaffold109281 | XP_010097744.1_D29         | -                                                      |
| scaffold109281 | XP_010091858.1_D2          | Uncharacterized protein                                |
| scaffold109281 | XP_010102941.1_D16         | Uncharacterized protein                                |
| scaffold109281 | XP_010087322.1_D3          | Uncharacterized protein                                |
| scaffold109281 | XP_010098788.1_D94         | HAT family dimerisation domain containing protein      |
| scaffold109281 | XP_010102094.1_D3          | Protein MKS1                                           |
| scaffold48691  | XP_010100479.1_D3          | Copia protein                                          |
| scaffold48691  | XP_010087170.1_D4          | Uncharacterized protein                                |
| scaffold48691  | VIT_18s0001g15710.t01_D1   | Peroxiredoxin Q                                        |
| scaffold48691  | XP_010108667.1_D1          | LRR receptor-like serine/threonine-protein kinase RCH1 |
| scaffold48691  | VIT_00s0227g00030.t01_D17  | Mutant gag-pol polyprotein                             |
| scaffold48691  | XP_010087406.1_D2          | Uncharacterized protein                                |

---

Table S4 The results of sequence comparison for four genes in two parents

| Gene ID                       | cDNA in ZZ1          | cDNA in QDY  | SNP | Numbers of difference AA |
|-------------------------------|----------------------|--------------|-----|--------------------------|
| VIT_07s0005g04110.t01_D1      | CL2178Contig1        | comp48284_c1 | 29  | 3                        |
| XP_010091051.1_D2             | Unigene7237          | comp42331_c0 | 13  | 3                        |
| XP_010091820.1_D1             | CL14335Contig1       | comp47252_c0 | 9   | 4                        |
| evm.model.scaffold7373.133_D1 | T2_Unigene_BMK.20714 | comp45758_c0 | 14  | 5                        |

Table S5 The EST ID of evm.model.scaffold7373.133\_D1 in 6 varieties investigated

| Variety         | Trait value of BT (MM) | EST ID in transcriptome |
|-----------------|------------------------|-------------------------|
| ZZ1             | 0.94                   | T2_Unigene_BMK.20714    |
| Dazhuhuangbaima | 1.00                   | comp36503_c0            |
| Chuanzhu 8      | 1.03                   | comp38697_c0            |
| Qingyezhuma     | 0.63                   | T1_Unigene_BMK.21700    |
| Huazhu 5        | 0.86                   | comp83814_c0_seq1_39    |
| QDY             | 0.72                   | comp45758_c0            |

Table S6 The primer for amplify the cDNA of evm.model.scaffold7373.133\_D1

| Name  | Forward Primer       | Reverse Primer       |
|-------|----------------------|----------------------|
| MYB-1 | TGCCCTCTCTCGATTCCCAT | GGCTTCCATGAGTGAGAGGA |
| MYB-2 | GACAACAAGCAAAGGGTGGT | GCAAGTGGCTTTTGACATGA |
| MYB-3 | GTTCAAAAACCGCCTTCAGA | CCGTTGTTGTTTTTCGAGGT |
| MYB-4 | GCTGCATGAACAGCTTGAGA | TCTTTAAGCAACGTCGTCCA |

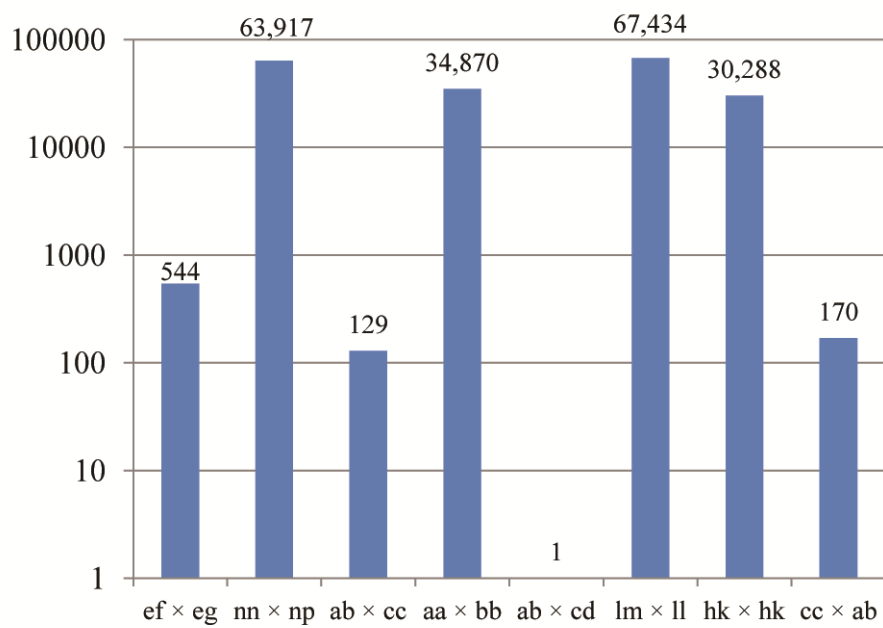

Fig. S1 The eight segregation patterns of SNPs and their number identified in this study

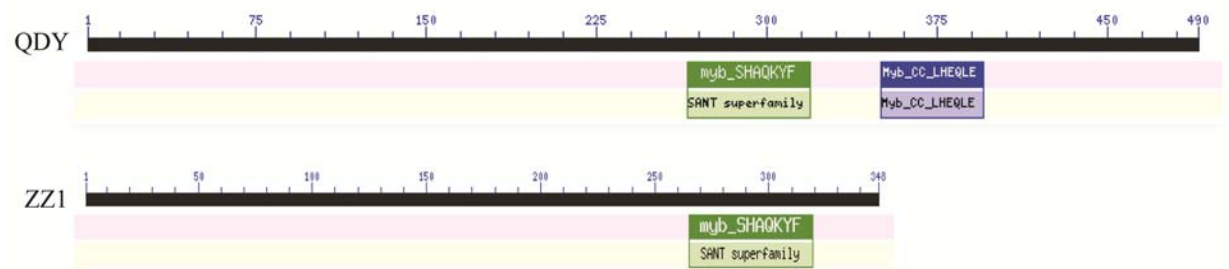

Fig. S2 The conserved domain of *evm.model.scaffold7373.133\_D1* protein predicted in CCD database of NCBI. A absence of a part of MYB domain in ZZ1 allele was observed.

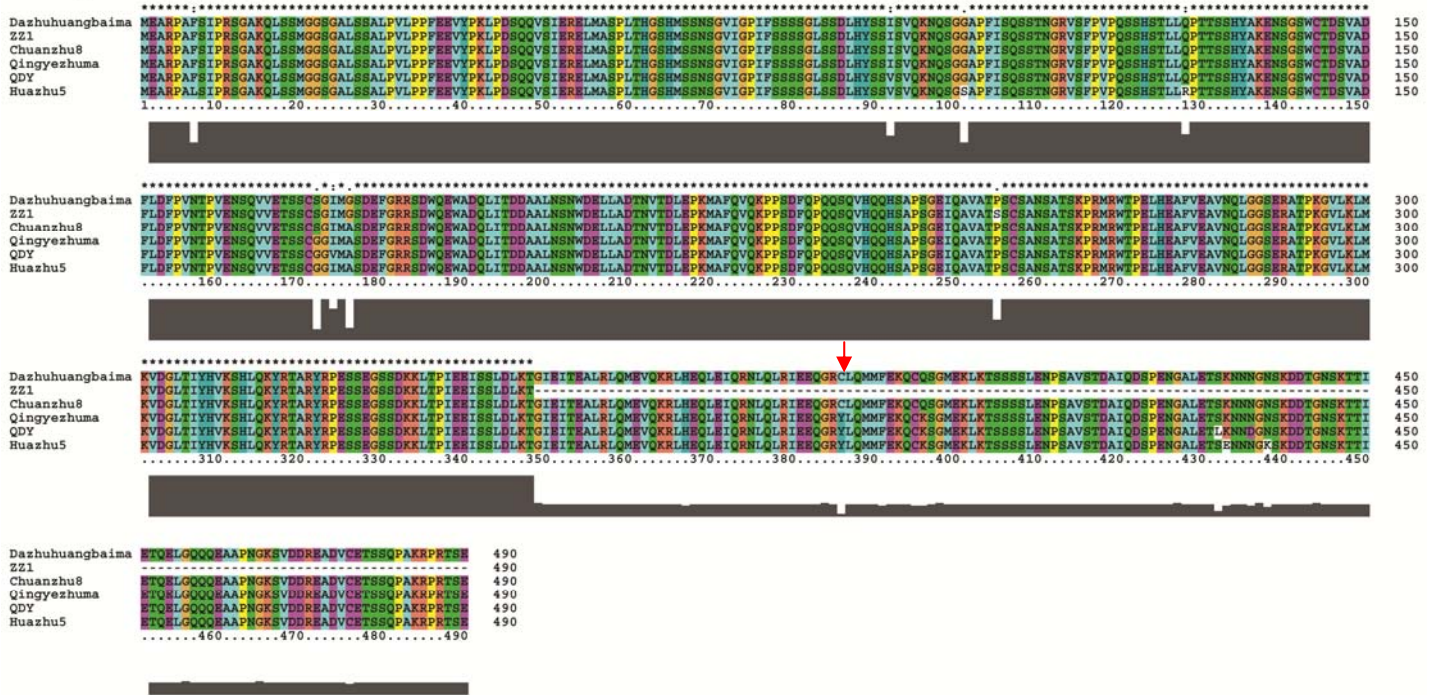

Fig. S3 Clustal X alignment of *evm.model.scaffold7373.133\_D1* encoding protein sequences in six varieties. The red arrow indicates a substitution of amino acid in the MYB domain.

## File S1 The sequence of *evm.model.scaffold7373.133\_D1* in *ZZ1* genome

### > Genome sequence

```
CAAAAAGTTTTCTCTAAAAAAGAAGTTAAGATAATTTCAATAAAAATTAATAATACACGTTATTTAAAAAAGTTAATAAAATA
TTGGAAGTTTTTTTTTGTGTTGTGACCTGTGCGAAGTATTCTGACATATTAATTTAGAATTTTGCAAAAAAGAAAAA
ATCAAAGTAGAAGCCAAAGCCCACGTTGCGAGAGGCATCAGATATTACCTCCAATTCACCAATCACACGCACTCACATCTC
ACCCCGTGGACCCACAACAAATGCCTCCACGCGCTCACCCTTAAAACGACACATTCGGGTACGTTTATCCACGCGCTCCAG
TGGCGCGTGGAAGAGCATAGACTGTTTCTTATGTCCGAAGAAAGACCAAAGAGAGAGAGAAAAAGAAAAGAAAAGAAAAG
AAAAAAAAAAAAACAGAGAATGGCAAAAGCAAAGCGCACTCGTCACCGTTCAATTCCTCGCGGTGAGAGAATTTCTTTTTT
TTTTTTTCTAATAAATAATAATAAAAAATGAAAAAATACCGGGCTGTCACCGTAGCTTTACCTCTCTTTCTCTTCCC
GTTTCGACCAATTTCTGGTCTCGATTTCGATTCTCGATCTCTCTCTCTCTCTCTCTCTCTCTCTCTCTCTCTCTCTCTCT
TTTTTCTTTTAACTTTCTCTATCAGTTTTCGGGTAAGATTGGGTCTGTAAGTTTCGAAAGTTTCGTGCTTTAAGCTATT
TGGCGGTGAAATCTCTGCCTCTGTGCTCTTTAGCGTGATTTTTTTTCCCCTATACTGTTTCATGGCGGATAATGTGTT
GCATATTTCTTATTATATCTTTTCATGCACTTAATTGGTTAGTTTCGATAAACGAGATTCGTTTTGAGCATGGTGTGACAT
AAGCCAGTTTCTATGCAATTTTTTCGGTGGATCAAAATGTTTTGATGATAGGACTGTTCTCGGAGTTTGTGTTAGCTTCAA
GTTATGATTTTTATCAATTCTCGAATATACTTATAAATTTCTCTTACCTTAGCTGAGAAATGGCTAAAGTTTTGTTTT
GTTTTTTCGTTTTTTTGTTTTTATCAGTTCTCAATCAGAGAGTATTATCTAGAAAATTGATTAGACAGACTATAGGACTGAT
TAGAGATTTCTGATATGTGTCATTTATGTCGAATCTCACGATTGTTGTTTCGTCGTCTAGACAATGATATTCATCGGTTGAG
AAATAAAAACTAATGAAAGAAAAAACAATGAGGGCTTGATTGTGTAAGCATGATTGATGATTGTTTACAGATTTCCA
TATTTTATTCTTTGCCATTAATGGTACTTCATTTCTTTTCAATTTCCAGAGGTGGTGATGACCTTTATTTGTTTTG
GATATTGACAACAAGCAAAGGTGGTTTTACTTATAGTAGGCTTGAGTTGGTGAGCTTTATTCTACAGCATCTTGATCACA
TACAAATACATAAATATACACATATATAATATGTGATCCATATTGTAATTCATAATAGTTGTTTTGGTGTAGGAAGACAAT
GGAGGCACGCCCTGCCTTTCAATTCGAGGTCGCGCGAAGCAACTCAGCAGCATGGGCGGTTCCGGGGCGCTCTCTTCGG
CTTTGCCGTGCTTCTCCGTTTGAAGAGGTATATCCAAAGTTACCGGACTCTCAACAAGTTTCCATTGAAAGGGAACAAATG
GCAAGTCTCTCACTCATGGAAGCCACATGAGCTCCAATCTGGAGTATTGGTCTATCTTTTCGTCGTCTCGGGACTCTC
ATCAGATCTCCACTACTCGTCCATTTTCGGTTCAGAAGAATCAGTCGGCGCGCTCCTTTATATCTCAGTCGTCGACTAATG
GGAGGTATCTTTCCCGTACCACAATCTTCGATTCGACACTGCTTCAACATCGAGTCATTATGCCAAAGAAAAAC
AGTGCTCCTGGTGTACAGATTCGGTTCGGGATTCTTGATTTTCTGTTAATACCCCTGTTGAGAATAGTCAAGTAGTAGA
AACAGTAGTTGTAGCGCATCATGGGTCCGACGAATTTGGGAGGCGTAGCGATTGGCAAGAATGGGCTGACCAGCTCATCA
CTGACGATGCTGCTTTAAATTTAACTGGGACGAATTTCTCGCCGACCAACGTAACGGATTGGAACCAAGGTTGGATCC
TCTTATATGTATGGCGCTTAAGATGCTTTTGCAAAGTTCCAAAAATAAATACATTTGCATAGTGAAGTTTGAATTTTGGTG
TGTAATTAGTCAACAAGCATTTTGGCTTCTGTTTTGTTGCTTCAGATGGCGTTCAGGTTCAAAAACCGCTTCAGATTTTC
AACCTCAGCAGTCCCAGGTTTCATCAACAGATTCTGCTCCATCTGGAGAAATCCAAGCCGTGCTACTCCGTCTTGTTCGGCT
AACAGTGCCACATCCAAGCCGCGCATGCGATGGACACCCGAATGCACGAGGCTTTGTGGAGGCTGTTAACCAACTGGTGG
CAGTGAAGTGTGTATCTCTTTGGCTGCTTGGTTCTAAATATTATAAGCTTCTGTTTCAGTTGGGTTAATTTTATTTATTT
ATTTACTTATTCTTATTTTAACTTTTTCAGGGGCAACACCTAAGGGCGTCTGAAACTTATGAAGTTGACGGCTTGACTATC
TATCATGTCAAAGCCACTTGCAGGATTATAATCTTTTGGCATTAGATCGTTTCTACAAAATGCATTGCTAGTGTGTTGT
GTTTTTCTGTGAGCTTTATCTAATCTTGAGCTTAATTCGTGAATTGCAGAAATATAGGACAGCTAGATATAGACGGAGTC
TTCAGAAGGTATGTAGCAAAAATCTCTTAAGTCTATTTTTGCATACAATCTGGTTGCTTTCTTTTTTATCTGTATTGGCTAT
TCCCTCCTATTTTGTGCATTAGTCTCTTGGTGTGCTGCACTTTTCTCTTTCTACTAGAAAACAGAAAGTGGCAGGTATGAC
ATGTATGCGCTTTTTTCTGCATTCCCCTGTGGAGGTGGGAAGTTTTGGTTCAACTACTGCTGCTATTACCTTTCCCT
CCCCCACAATATATGATTAATCACCATTGCGTTAACTGGTTTTACTTTCTATTGCGTATACATGTAAGATCTAACATCAA
CTTGATGTAAGTGAATTGACTCTCTGTGTGCAGGATCCTCAGATAAGAAATGACTCCCATGAAGAAATATCATCTCTTGAC
TTGAAAACGTGAGTCAATCTGTTAGCAATACTTTAAAAATATGAATTTTTTTTTTCGTTGATTATTTGGCTTGTGCAGTTTT
TAACTTTTTATGATTATCTGTATACGTCTTAGCAATTTTAGTGACGTTAACTGGACACCGTTTGTCTCCAAATGATT
```

GTGGTCGTAACCTATATGCTTGAACATTGATGGACATGCTATAAGCTCTAGTAATGTAGTCTGGGGATGTCTTGAGCTTGA  
AACTCCATCTATGTCTAGAAAAAGGACATGAATATAATCTAGTTTCCAAGGTTTCTTGCCGGTTGTAGTTAGAAGGAAGC  
CAGGATGAACAGAGGCTGCTTTTGTAGCTCCTTCTGCAACTTACCAGTCACTGGGGTTCTTAATTTGGATATATCCTTGAGCT  
GATGAACCTGCTGTGGACTCTCAAGTCGCTCTTTGTGTCAGTGTGTGCCAAGTACATGGCTTTAAACCAATAACCCAAGT  
ATGGCAAAATTAATATGTAAGACAGCAAAGTAAAATCTGCTCAAAGTAAAGAAGTATTTAAGCTAGATAGGGGTACATAAGC  
TGTTTACAGTGGTCTCTGCTTAAAGGTGAAAAGCTACCGTTCTGTATTTCAATCAATGAGTGGAGGCGGTGATCTAGAAGGGG  
GCCATTGTCACATTGTTCTACCTCTAAATATGGTTACGTTTTTCGTTTCAATATCTCATTATTAGGTTGAATTATACTGAA  
TATATTCTACTTGCTGAACAGGGGATTGAAATTAAGTGAAGCTCTGCGTTTGCAAATGGAAGTCCAGAAGCGGCTGCATGAAC  
AGCTTGAGTCTGACTCTTACCATGGGAATTCATTGCTTTATATAATATTGATTTACGATCATACTAAAAAATGGGCCAA  
TGGTTTTGTCCACCTGCAGAATTTCTGGGCTAAATCCCAGTGCCTTAAATGGTTTTTCTGTTCTTTTGATGTCCTATT  
GAAATGTTTCTGCTTCTGCAGATACAACGAAACCTGCAGTTGAGAATAGAAGAAACAGGCAGGTGCTTGCAGATGATGTTCC  
AGAAGCAATGCCAATCGGGTATGAAAAGCTGAAGACTTCATCCTCCTCTTTGGAGAATCCCTCTGCCGTGTCTACTGATGCA  
ATTCAAGATTTCCCTGAAAATGGTGCATTAGAAACCTCGAAAAACAACAACGGGAAACAGCAAAGACGATACAGGCAATTCAAA  
AACCACAATAGAAACCAAGAGCTCGGCCAGCAGCAAGAGGCTGCACCAACGGGAAATCGGTAGATGATCGCGAGGCAGACG  
TATGTGAGACAAGCTCCCAACCCGCAAGCGCCGAGACAAGTGAATAAGCCGTACCATCGATCAACTTAGCATTAGCGTCA  
AACTAACAGTTCAGTACATTATTAATCTTGACTAAGGCAAGTGTGCGCTGTAGATTGAAAGAGCTTCGAAGAATTTGAG  
GTCCTTCTCTCGTGTCTAAGTGTGTTTTATTATCATGAGCTCACTTGATGCAGTCTCTCTATCTGGATGATGATTGGAG  
CTCGTTACAAGTTTTGTCCCTTATTATCTTAAACCTCTACTAGTACACTCTCTTGCCAAAGTAAAGGATGAGGCTCTCAT  
AATAGATTGTGCCTTTAGAGGTGTTGTATCTTTGAGGGACTGAATGTTCTCTAGTTTTAAGCTATGGATAATAAATGTTAC  
TGCCCAATAATGCTAATAAATCCTAATCTGAAGATTAGCACTGTACATTCCGTTTCGCACTCCGGTTCAGACCGGTGATCGG  
TACTTGGGTAGCAATGACTGTTTCAGACCTTTTTTCTTCTGAAGTTTCAAGCTTGTGCTTTTCTACTTATGCTAACTGTGT  
GCGTTAGATGGACGACGTTGCTTAAAGATCTAAAATCCATCTTACCAGAAAATACATACGATCAGCCCAACCGAACTTTGAGCT  
TAAAGAATAAAGCTTATGCCAAGAAAGTAAAACATGAAACATCAGACATTGACAAAAGATTGTTCCACAAATGTG  
TTTTGAGCGAGTTTATTATTGATCGTTGAAGGCTGTACAATGAAGCTTGAACAATGGAGGGAGCAAAATCAAACATAGATGA  
TAATCCAAGCGATTTCATGTAGACCTCGCAAACCTGACAGTTTACATTCTTTATTCCTTTTATCATATTTTTCAGAGAAATGA  
TTAATTTGGAGGGCAAAAAAAAAAAAAAAAAAGAGACAACCTGATGAATTTGGTTATGAAGAAAAGTGGGGTACTTGACATATA  
GCAACAAGACGGTGCCAAAAAGAAGTATTTTATTGTTTGTAGGAAAAAATCATCTACCCTTGGCCTCATAGACGCCTT  
TGAACCTAAGCAACCAAAAAAAAAAAAAAAAAAGACAGACCAAAACCATCTTCTTGAACCAATTCATCGCTCCTCTCAT  
CACTAACGTCTTTATAATCAAATAACTGACTTCCCAACTCACAGTAGGTAGACTCAACTCACTTACACCTCACACAATGTT  
CTTTTTTCTTCACTTTCACCTTCAAACCTTCAATATAACTATACCTTCACTTCTTCTTCTTCAACCTTTCGCA
